# Supplementary material for: Asthma Is Associated with Back Pain and Migraine—Results of Population-Based Case–Control Study
Source: MDPI journal article supplement (doi:10.3390/jcm12227107), 2023-11-15
Supplement: s1 [file s1]

Table S1. Questions and possible answers of the 2014 and 2022 EHISS questionnaires used to create the study variables.

| Questions                                                                                                                                   | Description and answer                                                                                                                                                                                                                                                                                                                                                                                                                                       | Variables                             | Categories                                                                                                       |
|---------------------------------------------------------------------------------------------------------------------------------------------|--------------------------------------------------------------------------------------------------------------------------------------------------------------------------------------------------------------------------------------------------------------------------------------------------------------------------------------------------------------------------------------------------------------------------------------------------------------|---------------------------------------|------------------------------------------------------------------------------------------------------------------|
| Which is your sex?                                                                                                                          | 1. Men<br>2. Women                                                                                                                                                                                                                                                                                                                                                                                                                                           | Sex                                   | 1. Men<br>2. Women                                                                                               |
| How old are you?                                                                                                                            | Age in years                                                                                                                                                                                                                                                                                                                                                                                                                                                 | Age groups                            | 1. 18-49<br>2. 50-69<br>3. 70 or over                                                                            |
| <i>Has your doctor told you that you are suffering from asthma?</i>                                                                         | 1.Yes<br>2.No                                                                                                                                                                                                                                                                                                                                                                                                                                                | Asthma                                | 1. Case<br>2. Control                                                                                            |
| <i>Has your doctor told you that you are suffering from chronic neck pain (6 or more months)?</i>                                           | 1.Yes<br>2.No                                                                                                                                                                                                                                                                                                                                                                                                                                                | <i>Chronic neck pain</i>              | 1. Yes<br>2. No                                                                                                  |
| <i>Has your doctor told you that you are suffering from chronic low back pain (6 or more months)?</i>                                       | 1.Yes<br>2.No                                                                                                                                                                                                                                                                                                                                                                                                                                                | <i>Chronic low back pain</i>          | 1. Yes<br>2. No                                                                                                  |
| <i>Has your doctor told you that you are suffering from migraine or frequent headaches?</i>                                                 | 1.Yes<br>2.No                                                                                                                                                                                                                                                                                                                                                                                                                                                | <i>Migraine or frequent headaches</i> | 1. Yes<br>2. No                                                                                                  |
| What level of education have you completed?                                                                                                 | 1. Does not know how to read or write<br>2. Incomplete primary education<br>3. Complete primary education<br>4. First stage of Secondary Education, with or without a qualification<br>5. Elementary Spanish Upper Secondary Education<br>6. Upper secondary education<br>7. Intermediate vocational training or equivalent<br>8. Advanced vocational training or equivalent<br>9. University studies or equivalent<br>10. Over university (master, PhD....) | Educational level                     | 1. No studies/Primary: Options 1 to 3<br>2. Secondary: Options 4 to 8<br>3. High education: Options 9 and 10     |
| What is your marital status?                                                                                                                | 1. Single<br>2. Married<br>3. Widower<br>4. Separated<br>5. Divorced                                                                                                                                                                                                                                                                                                                                                                                         | Living with a partner                 | 1. Yes: Option 2<br>2. Nor: options 1, 3, 4 and 5                                                                |
| “Over the last four week, what intensity of pain have you suffered?                                                                         | 1 None,<br>2. Very light,<br>3. Light,<br>4. Moderate,<br>5. Severe<br>6. Extreme.                                                                                                                                                                                                                                                                                                                                                                           | Pain intensity                        | 1, No pain. Option 1<br>2. Light. Options 2 and 3<br>3. Moderate. Option 4<br>4. Severe/extreme. Options 5 and 6 |
| 1. Next I am going to read you a list of types of medications, please tell me which one or more of them have you taken in the last 2 weeks? | A list of 23 medications is read the person interviewed including<br>1 pain medication                                                                                                                                                                                                                                                                                                                                                                       | Use of pain medication                | 1. Yes<br>2. No                                                                                                  |

Table S1. Questions and possible answers of the 2014 and 2022 EHISS questionnaires used to create the study variables. (Continued)

| Questions                                                                                                                                                               | Description and answer                                                                                                                                                                                                                                                                         | Variables           | Categories                                                                   |
|-------------------------------------------------------------------------------------------------------------------------------------------------------------------------|------------------------------------------------------------------------------------------------------------------------------------------------------------------------------------------------------------------------------------------------------------------------------------------------|---------------------|------------------------------------------------------------------------------|
| In the past twelve month, how is your perception of your general health status?                                                                                         | 1. Very good<br>2. Good<br>3. Fair<br>4. Bad<br>5. Very bad                                                                                                                                                                                                                                    | Self-rated health   | 1. Very good/good: Options 1 and 2<br>2. Fair/poor/very poor: Options 3 to 5 |
| <i>Has your doctor told you that you are suffering from COPD?</i>                                                                                                       | 1.Yes<br>2.No                                                                                                                                                                                                                                                                                  | COPD                | 1. Yes<br>2. No                                                              |
| <i>Has your doctor told you that you are suffering from diabetes?</i>                                                                                                   | 1.Yes<br>2.No                                                                                                                                                                                                                                                                                  | Diabetes            | 1. Yes<br>2. No                                                              |
| <i>Has your doctor told you that you are suffering from stroke?</i>                                                                                                     | 1.Yes<br>2.No                                                                                                                                                                                                                                                                                  | Stroke              | 1. Yes<br>2. No                                                              |
| <i>Has your doctor told you that you are suffering from cancers?</i>                                                                                                    | 1.Yes<br>2.No                                                                                                                                                                                                                                                                                  | Cancer              | 1. Yes<br>2. No                                                              |
| <i>Has your doctor told you that you are suffering from anxiety or depression?</i>                                                                                      | 1.Yes<br>2.No                                                                                                                                                                                                                                                                                  | Mental disease      | 1. Yes<br>2. No                                                              |
| <i>Has your doctor told you that you are suffering from High blood pressure?</i>                                                                                        | 1.Yes<br>2.No                                                                                                                                                                                                                                                                                  | High blood pressure | 1. Yes<br>2. No                                                              |
| Which of these possibilities best describes how often you do some physical activity in your free time?                                                                  | 1. I don't exercise. I occupy my free time almost completely sedentary<br>2. I do some occasional physical or sports activity<br>3. I do physical activity several times a month<br>4. I do sports or physical training several times a week                                                   | Sedentary lifestyle | 1. Yes: Option 1<br>2. No: Option 2 to 4                                     |
| During the past 12 months, how often have you had alcoholic beverages of any kind (i.e. beer, wine, spirits, distilled and mixed drinks, or other alcoholic beverages)? | 1. Daily or almost daily<br>2. 5-6 days per week<br>3. 3-4 days per week<br>4. 1-2 days per week<br>5. 2-3 days in a month<br>6. Once a month<br>7. Less than once a month<br>8. Not in the last 12 months, have I stopped drinking<br>9. Never or just a few sips to taste it throughout life | Alcohol consumption | 1. Yes: Options 1 to 6<br>2. No: Option 7 to 9                               |
| Could you tell me if you smoke?                                                                                                                                         | 1. Yes, I smoke daily<br>2. Yes, I smoke, but not daily<br>3. I don't currently smoke but have smoked before<br>4. I neither smoke nor have I ever smoked regularly                                                                                                                            | Active smoking      | 1. Yes: Options 1 and 2<br>2. No: Options 3 and 4                            |
| 1. Could you tell me how tall you are, approximately, without shoes?<br>2. Could you tell me your weight, approximately, without shoes and clothes?                     | Body mass index is calculated with the formulae:<br>Weight in kg/ (Height in meters) <sup>2</sup>                                                                                                                                                                                              | Body mass index     | 1. <25<br>2, 25-29.9<br>3. ≥30                                               |

COPD, Chronic obstructive pulmonary disease.

**Table S2.** Sensitivity analysis.

|                        |                     | CNP                | CLBP               | MFH              |
|------------------------|---------------------|--------------------|--------------------|------------------|
|                        |                     | OR (95% CI)        | OR (95%CI)         | OR (95%CI)       |
| Sex                    | Man                 | 1                  | 1                  | 1                |
|                        | Women               | 1.45 (1.18-1.79)   | 1.18 (1.02-1.40)   | 2.24 (1.72-2.92) |
| Age groups             | 18-49 years         | 1                  | 1                  | 1                |
|                        | 50-69 years         | 1.39 (1.09-1.77)   | 1.67 (1.32-2.11)   | 0.45 (0.34-0.58) |
|                        | 70 years or over    | 1.40 (1.09-1.80)   | 1.41 (1.10-1.82)   | 0.22 (0.16-0.29) |
| Self-rated health      | Very good/good      | 1                  | 1                  | 1                |
|                        | Fair/poor/very poor | 0.57 (0.46-0.71)   | 0.48 (0.39-0.60)   | 0.76 (0.59-0.99) |
| COPD                   | No                  | 1                  | 1                  | 1                |
|                        | Yes                 | 1.32 (1.04-1.69)   | 1.28 (1.01-1.63)   | 1.32 (1.00-1.74) |
| Mental disorder        | No                  | 1                  | 1                  | 1                |
|                        | Yes                 | 1.36 (1.09-1.68)   | 1.30 (1.05-1.61)   | 2.25 (1.79-2.84) |
| Use of pain medication | No                  | 1                  | 1                  | 1                |
|                        | Yes                 | 1.48 (1.20-1.82)   | 2.51 (2.06-3.05)   | 2.39 (1.88-3.05) |
| Concomitant CNP        | No                  | NA                 | 1                  | 1                |
|                        | Yes                 | NA                 | 10.07 (8.30-12.23) | 1.90 (1.47-2.47) |
| Concomitant CLBP       | No                  | 1                  | NA                 | 1                |
|                        | Yes                 | 10.11 (8.33-12.28) | NA                 | 1.55 (1.19-2.03) |
| Concomitant MFH        | No                  | 1                  | 1                  | NA               |
|                        | Yes                 | 1.88 (1.45-2.45)   | 1.54 (1.18-2.00)   | NA               |
| Year                   | 2020                | 0.87 (0.68-1.03)   | 0.96 (0.80-1.15)   | 0.83 (0.67-1.31) |
| Asthma                 | No                  | 1                  | 1                  | 1                |
|                        | Yes                 | 1.45 (1.19-1.76)   | 1.37 (1.11-1.64)   | 1.19 (1.02-1.51) |

COPD, Chronic obstructive pulmonary disease. NA, Not adequate. NIFM, Not included in final the model. OR, Odds ratios estimated using multivariable unconditional logistic regression. CI, Confidence interval.
